# Supplementary material for: CdS-POM nanosheets for highly efficient visible-light-driven H2 evolution
Source: Royal Society of Chemistry journal article supplement (doi:10.1039/d3qi00766a), 2023-01-01
Supplement: d3qi00766a1.pdf [file d3qi00766a1.pdf]

## Supporting Information

### **CdS-POM nanosheet for highly efficient visible-light-driven H<sub>2</sub> evolution**

Wen-Xiong Shi,<sup>a</sup> Zhi-Yong Liu,<sup>a</sup> and Zhi-Ming Zhang,<sup>\*a</sup>

<sup>†</sup>Institute for New Energy Materials and Low Carbon Technologies, School of Materials Science & Engineering, Tianjin University of Technology, Tianjin 300384, China

## Table of Contents

|                                                                                                 |    |
|-------------------------------------------------------------------------------------------------|----|
| Figure S1. XRD patterns of the different POM doped into CdS.....                                | 3  |
| Figure S2. FT-IR spectra of the different POM doped into CdS. ....                              | 4  |
| Figure S3. TEM and HRTEM images of CdS. ....                                                    | 5  |
| Figure S4. Calibration curves of Mo elements for ICP-MS.....                                    | 6  |
| Figure S5. ESI-MS spectrum of PMo <sub>12</sub> .....                                           | 7  |
| Figure S6. The XPS survey spectrum. ....                                                        | 8  |
| Figure S7. Ultraviolet–visible diffuse reflectance spectra. ....                                | 9  |
| Figure S8. Band-gap calculation of CdS and PMo <sub>12</sub> .....                              | 10 |
| Figure S9. UPS spectra of CdS and PMo <sub>12</sub> . ....                                      | 11 |
| Figure S10. Mott-Schottky diagram of CdS and PMo <sub>12</sub> . ....                           | 12 |
| Figure S11-13. A comparison of the visible-light-driven H <sub>2</sub> evolution rates .....    | 13 |
| Figure S14. PXRD patterns of CdS@PMo <sub>12</sub> -3 before and after the photocatalytic ....  | 16 |
| Figure S15. FT-IR spectra of CdS@PMo <sub>12</sub> -3 before and after the photocatalytic ..... | 17 |
| Figure S16. Proposed possible mechanism schematic .....                                         | 18 |
| Table S1. ICP-MS results of CdS@PMo <sub>12</sub> .....                                         | 19 |
| Table S2. A comparison of the H <sub>2</sub> -production rates .....                            | 20 |
| References .....                                                                                | 21 |

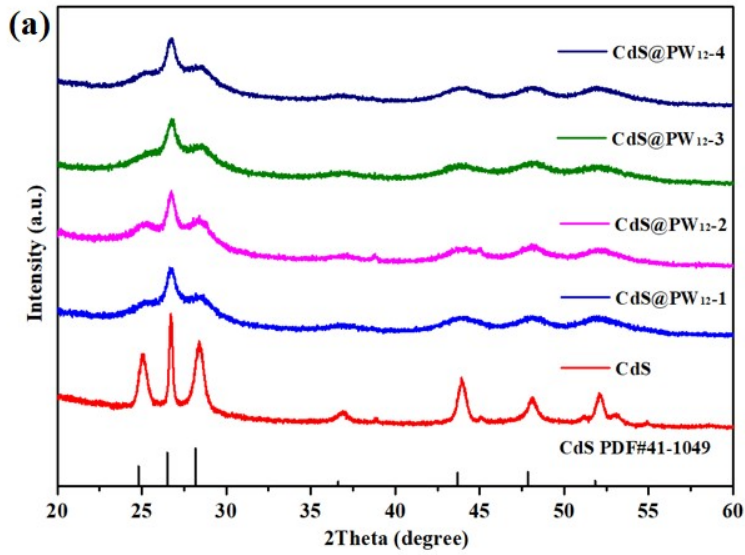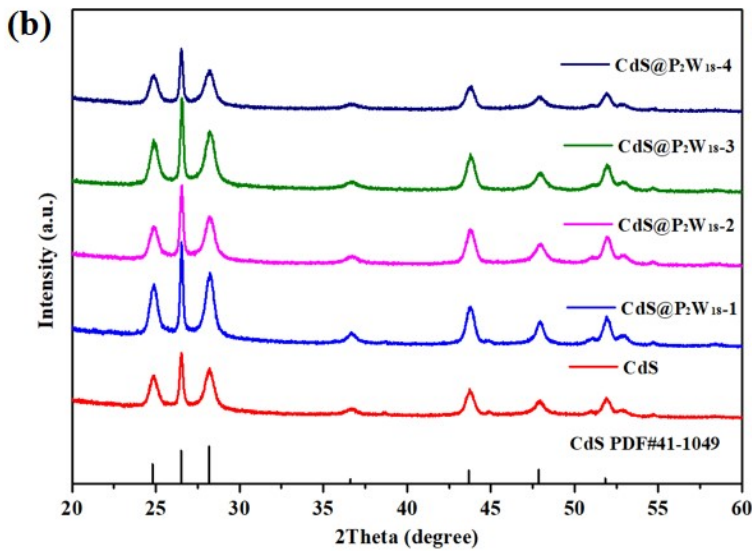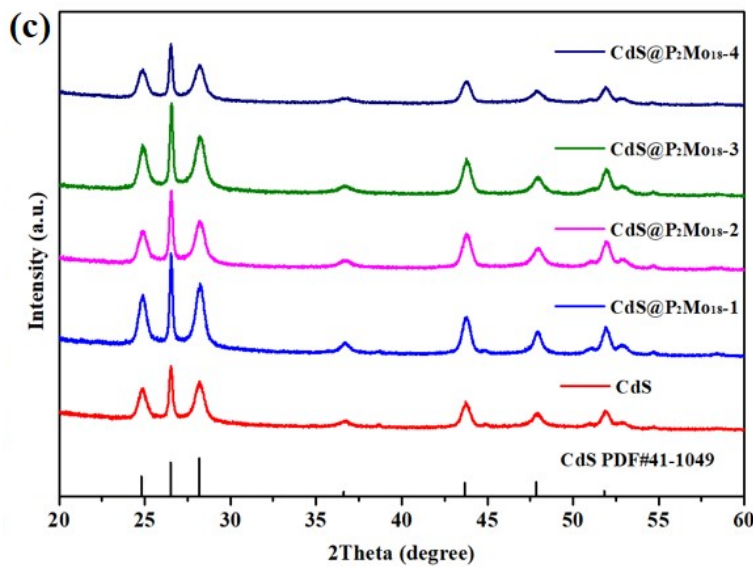

**Figure S1.** XRD patterns of the different POM doped into CdS. (a) XRD patterns of CdS@PW<sub>12</sub> composite photocatalysts. (b) XRD patterns of CdS@P<sub>2</sub>W<sub>18</sub> composite photocatalysts. (c) XRD patterns of CdS@P<sub>2</sub>Mo<sub>18</sub> composite photocatalysts.

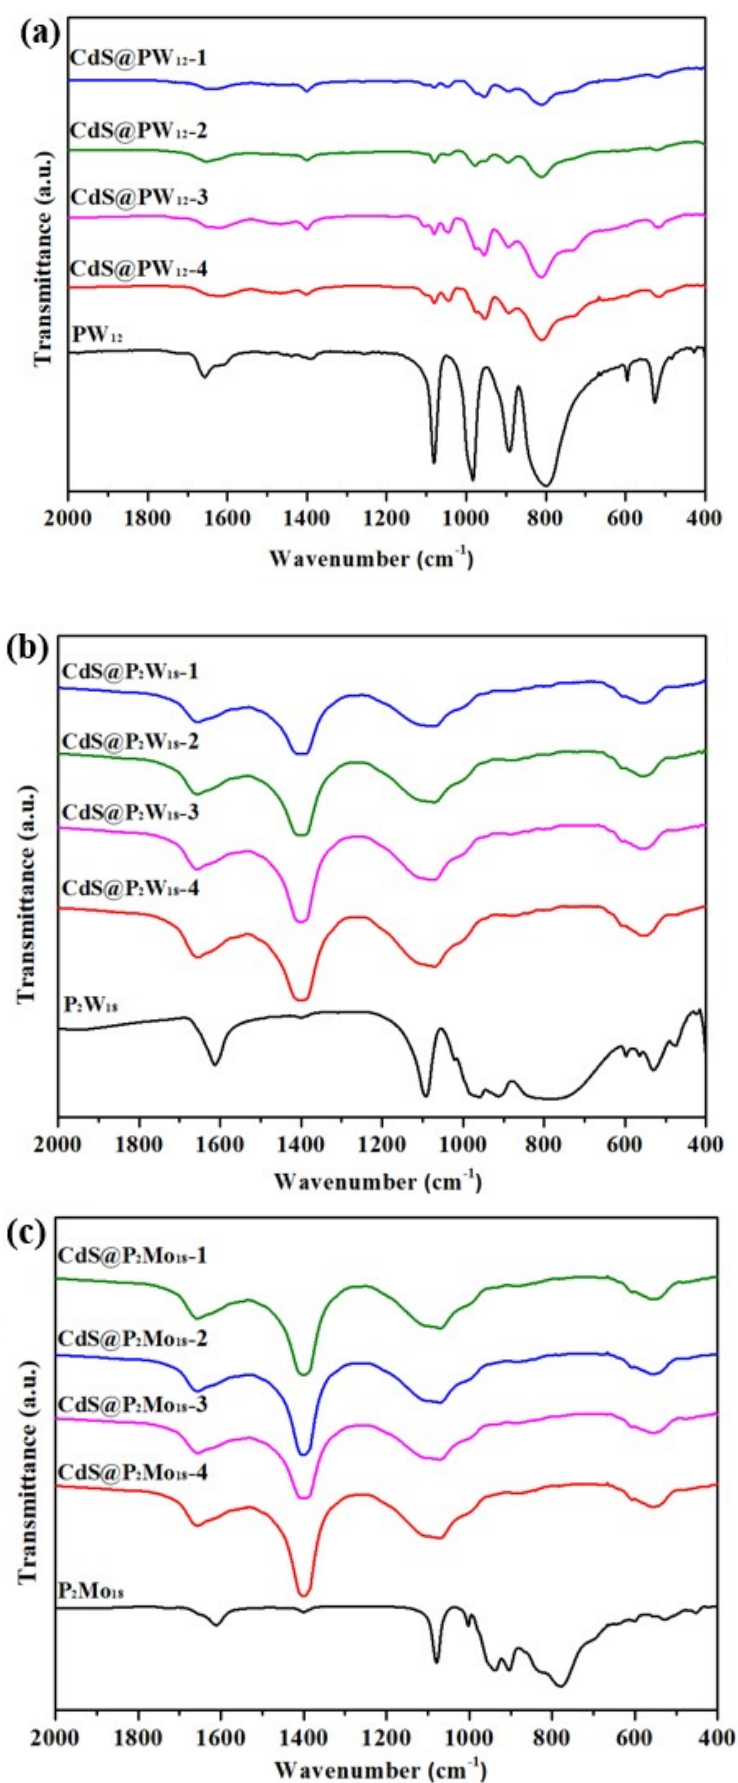

**Figure S2.** (a) FT-IR spectra of CdS@PW<sub>12</sub> composite photocatalysts. (b) FT-IR spectra of CdS@P<sub>2</sub>W<sub>18</sub> composite photocatalysts. (c) FT-IR spectra of CdS@P<sub>2</sub>Mo<sub>18</sub> composite photocatalysts.

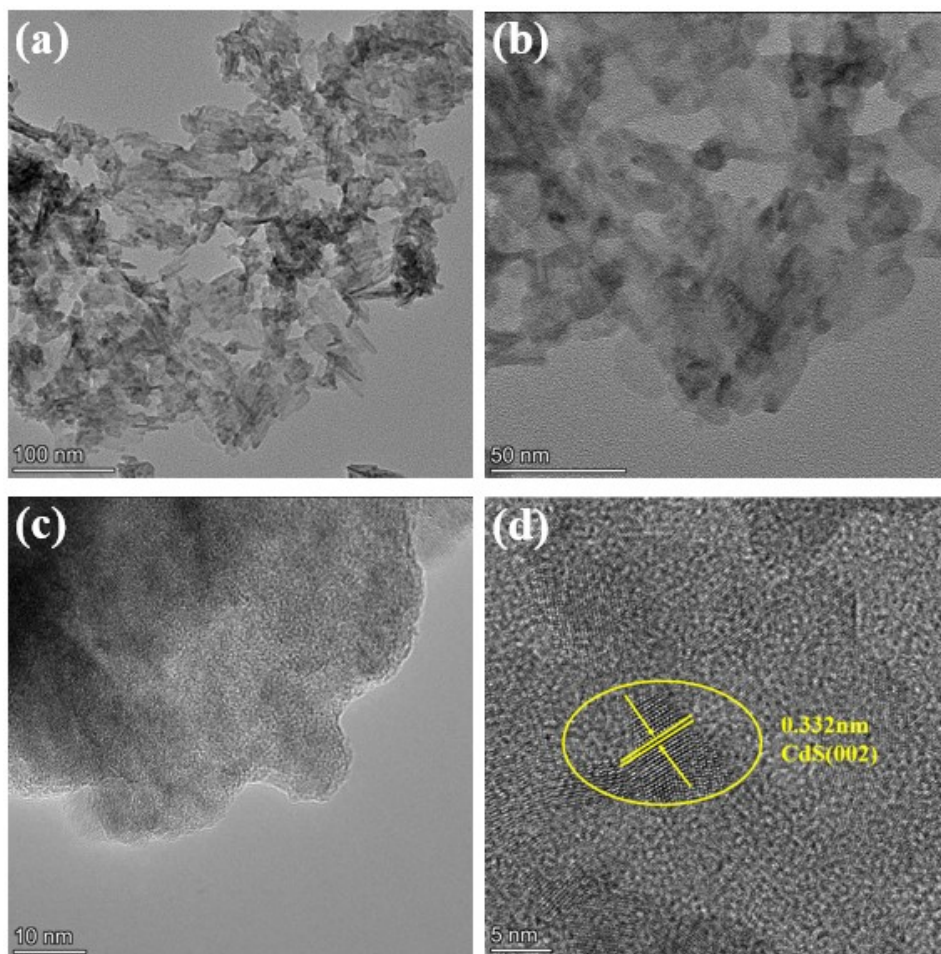

**Figure S3.** (a) TEM of CdS and (b-d), HRTEM images of CdS.

### 95Mo (KED)

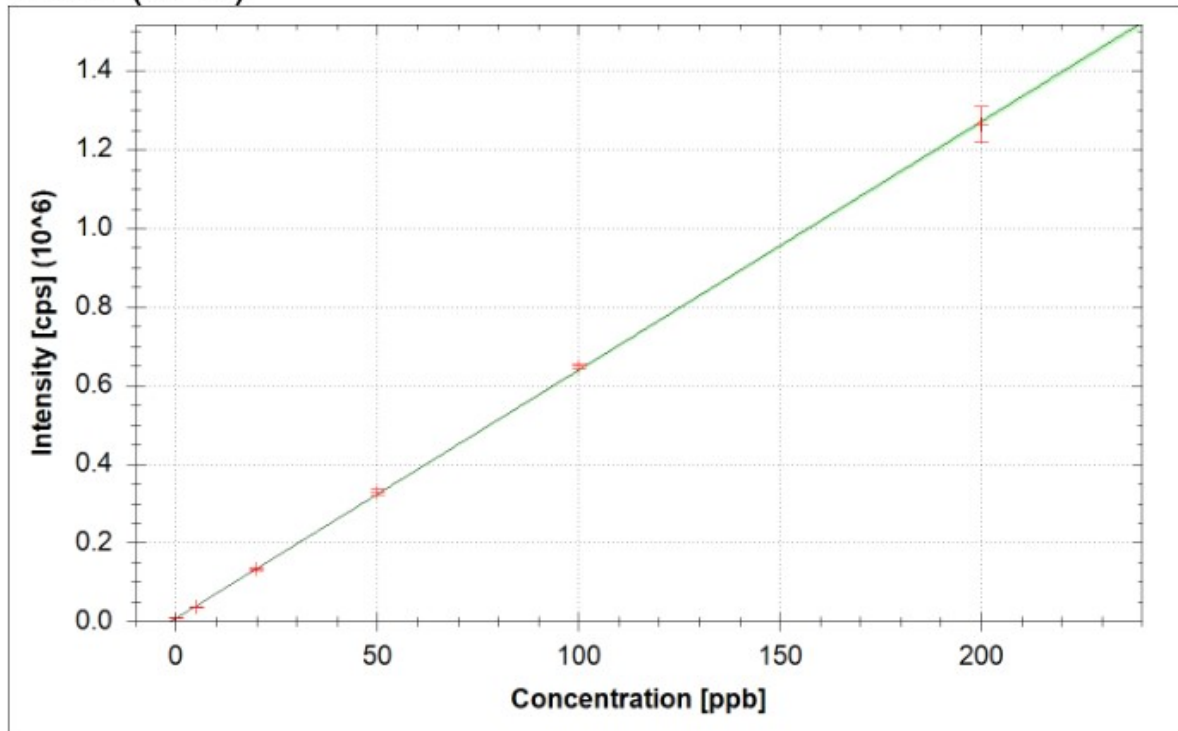

$$f(x) = 6314.5539 \cdot x + 7972.5991$$

$$R^2 = 0.9999$$

$$\text{BEC} = 1.263 \text{ ppb}$$

$$\text{LoD} = 0.2354 \text{ ppb}$$

**Figure S4.** Calibration curves of Mo elements for ICP-MS.

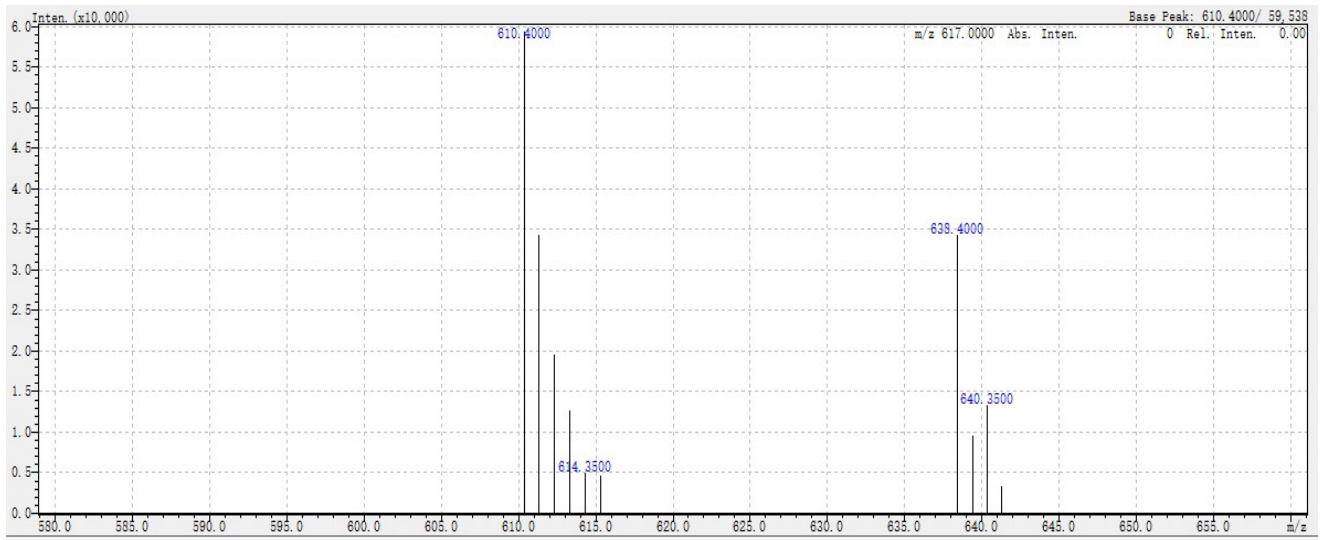

Figure S5. ESI-MS spectrum of  $\text{PMo}_{12}$ .

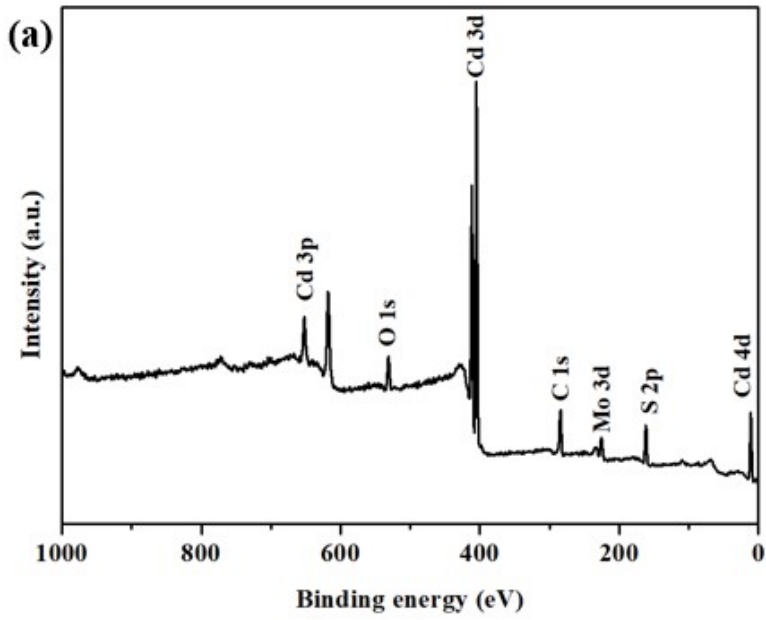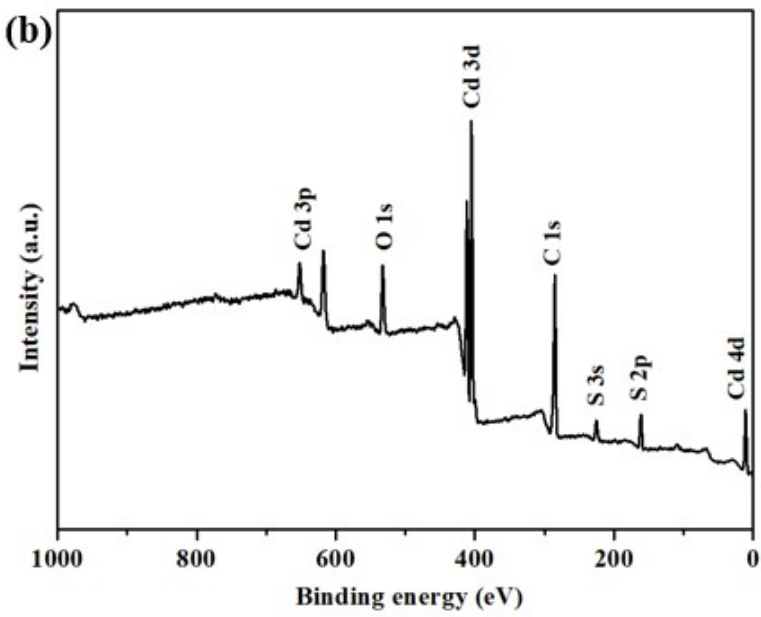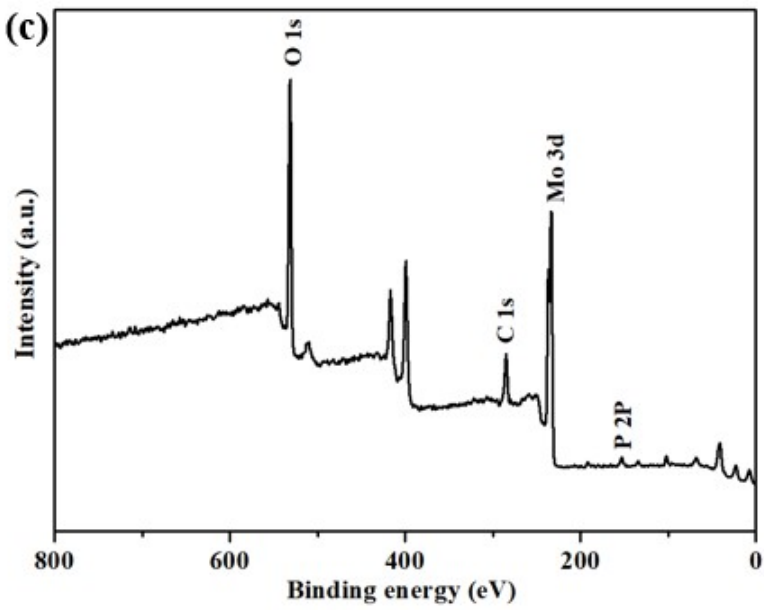

**Figure S6.** (a) The XPS survey spectrum of CdS@PMo<sub>12-3</sub>. (b) The XPS survey spectrum of CdS. (c) The XPS survey spectrum of PMo<sub>12</sub>.



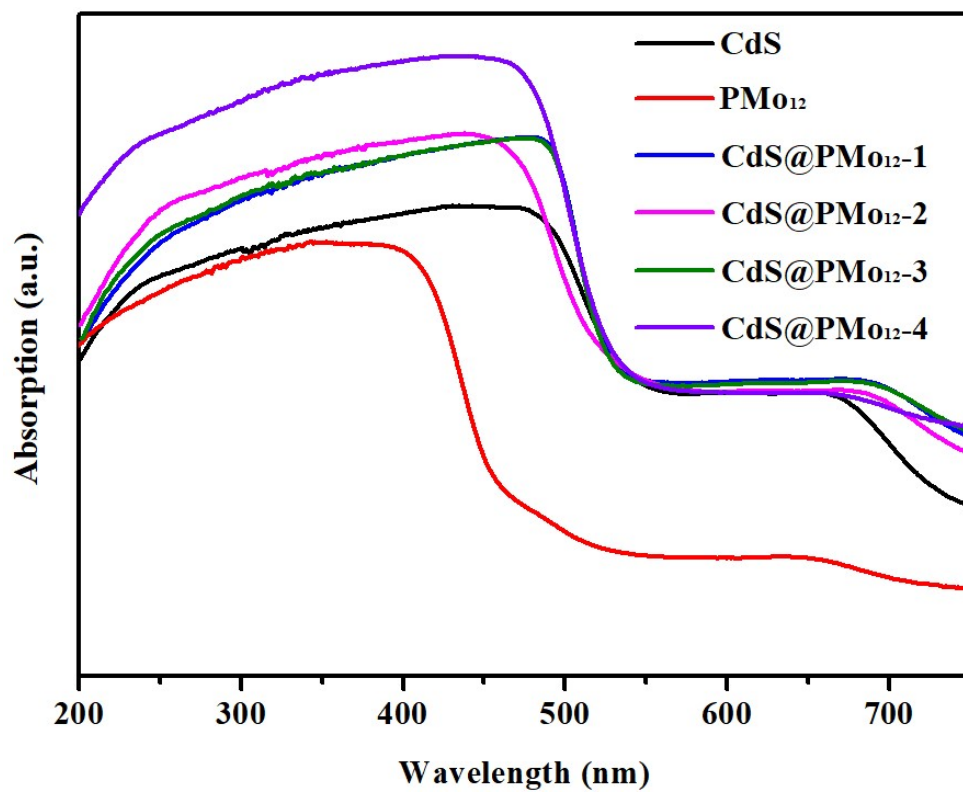

**Figure S7.** Ultraviolet-visible diffuse reflectance spectra of CdS, PMo<sub>12</sub> and CdS@PMo<sub>12</sub>.

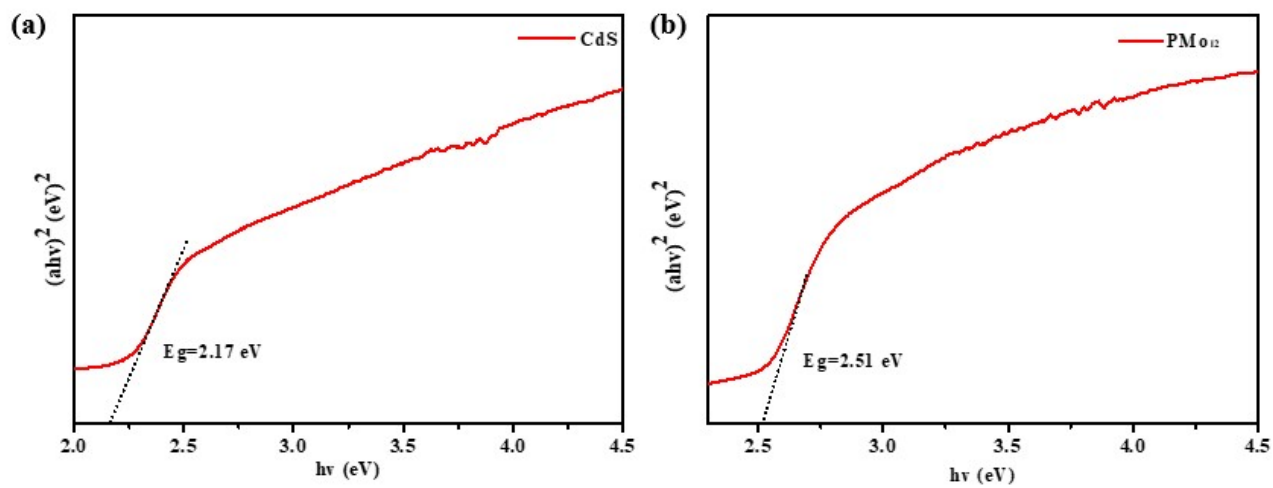

**Figure S8.** (a) Band-gap calculation of CdS. (b) Band-gap calculation of PMo<sub>12</sub>.

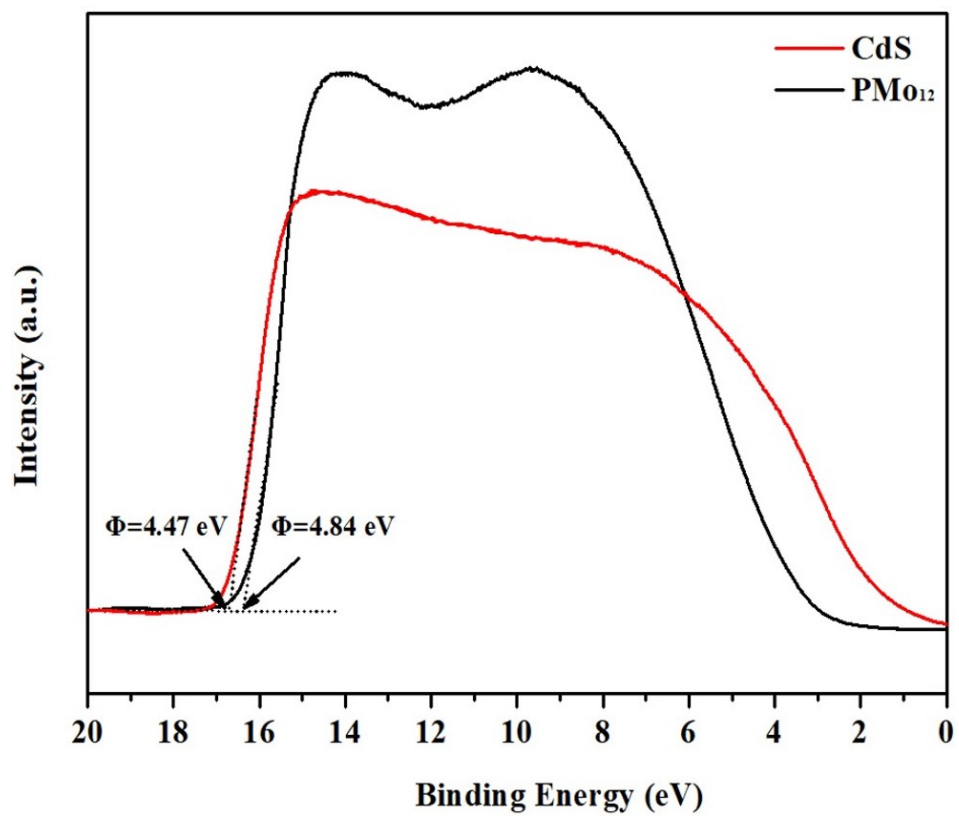

Figure S9. UPS spectra of CdS and PMo<sub>12</sub>.

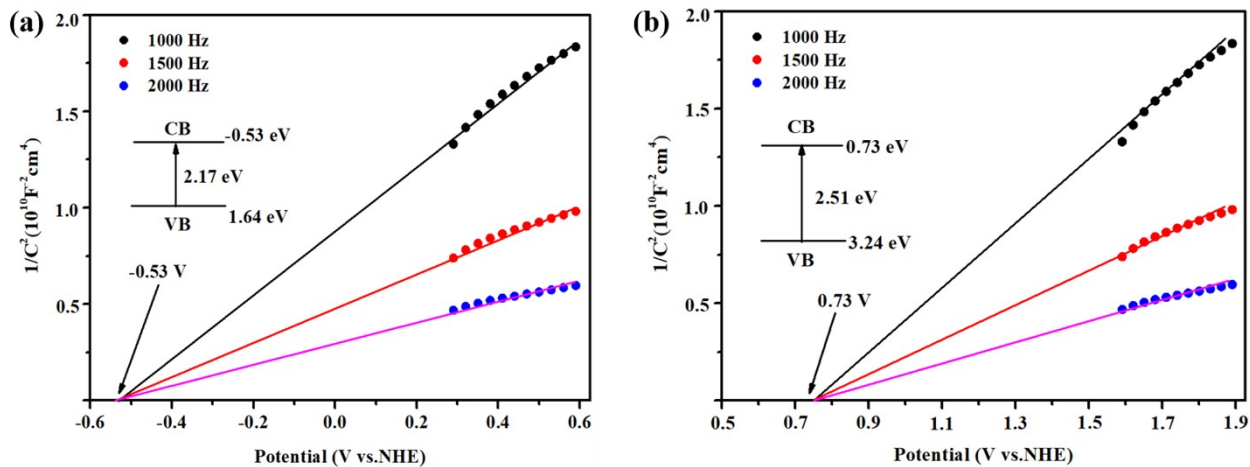

**Figure S10.** (a) Mott-Schottky diagram of CdS. (b) Mott-Schottky diagram of PMo<sub>12</sub>.

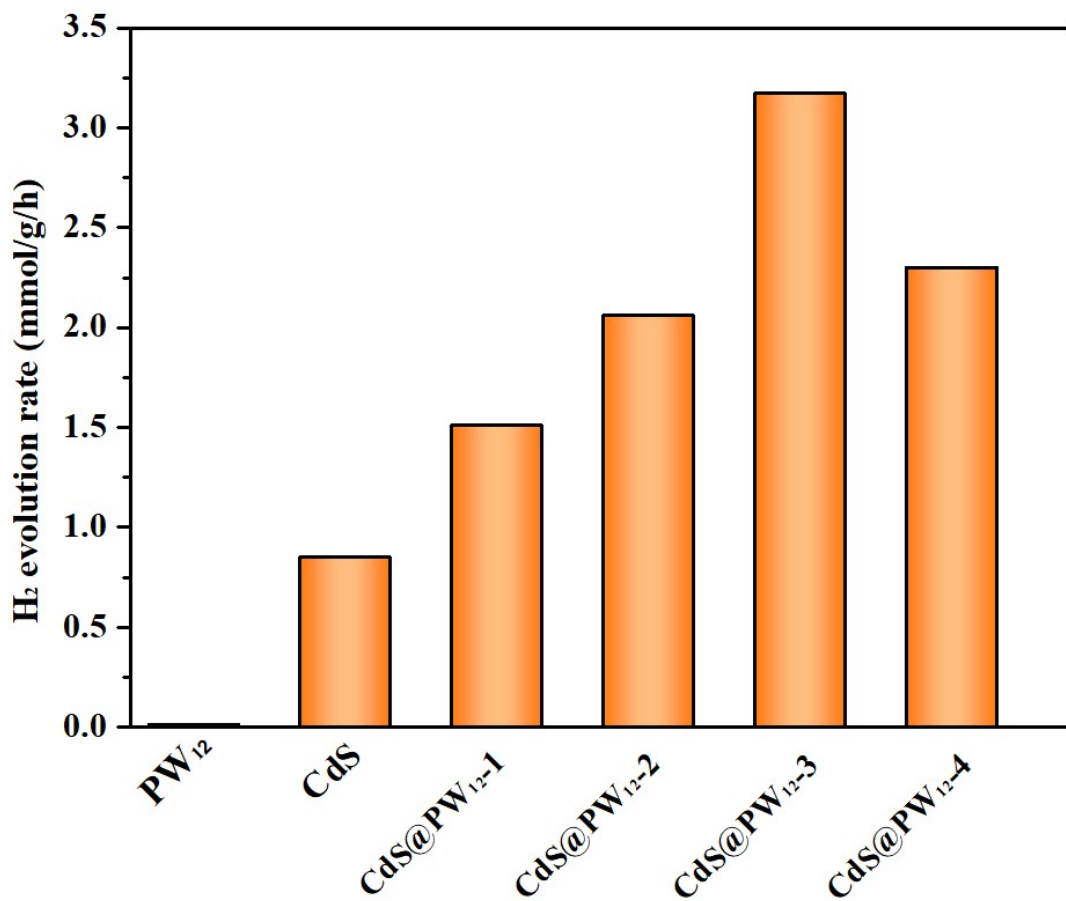

**Figure S11.** A comparison of the visible-light-driven H<sub>2</sub> evolution rates based on CdS, PW<sub>12</sub> and CdS@PW<sub>12</sub> as photocatalysts ( $\lambda > 420$  nm).

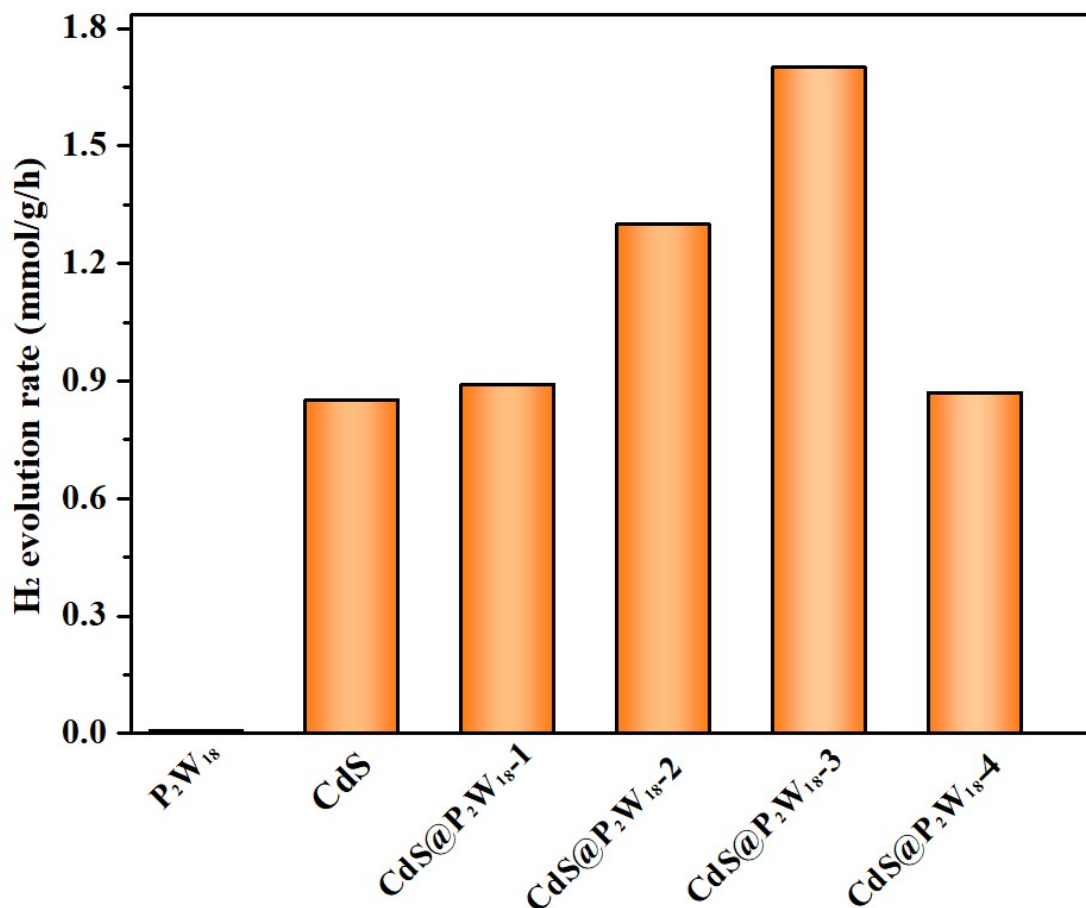

**Figure S12.** A comparison of the visible-light-driven H<sub>2</sub> evolution rates based on CdS, P<sub>2</sub>W<sub>18</sub> and CdS@P<sub>2</sub>W<sub>18</sub> as photocatalysts ( $\lambda > 420$  nm).

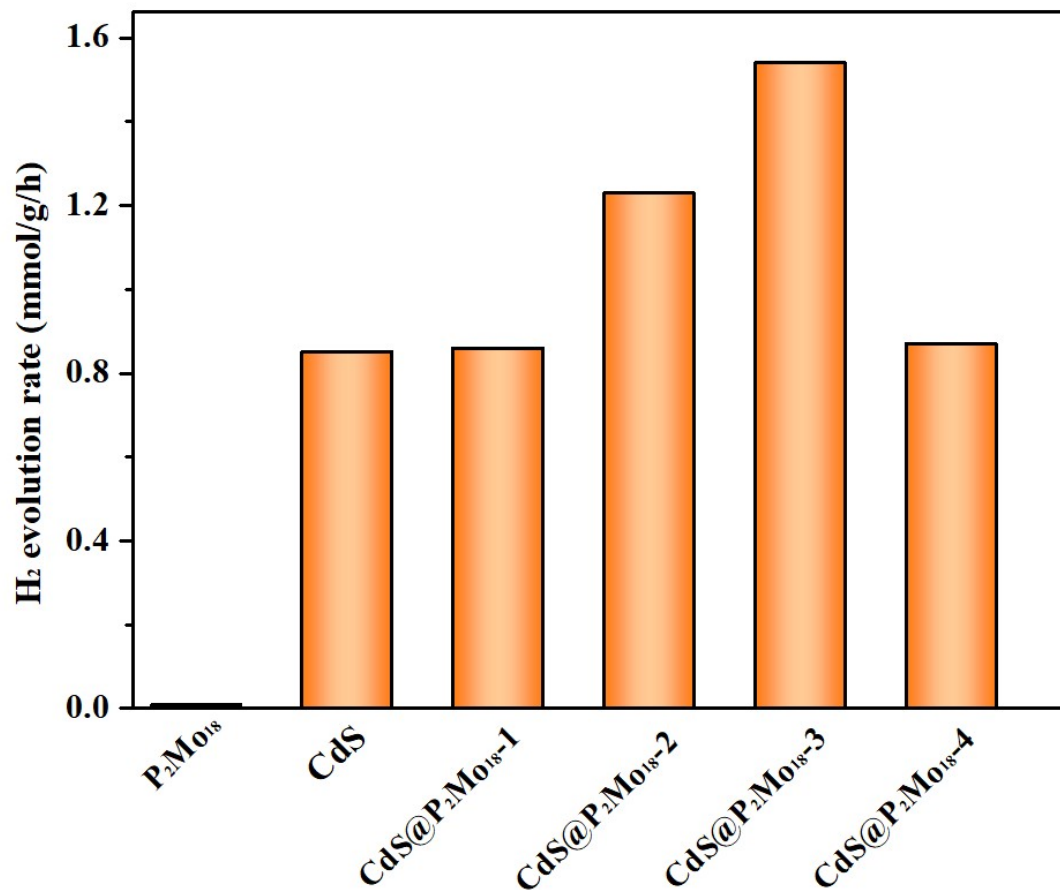

**Figure S13.** A comparison of the visible-light-driven H<sub>2</sub> evolution rates based on CdS, P<sub>2</sub>Mo<sub>18</sub> and CdS@P<sub>2</sub>Mo<sub>18</sub> as photocatalysts ( $\lambda > 420$  nm).

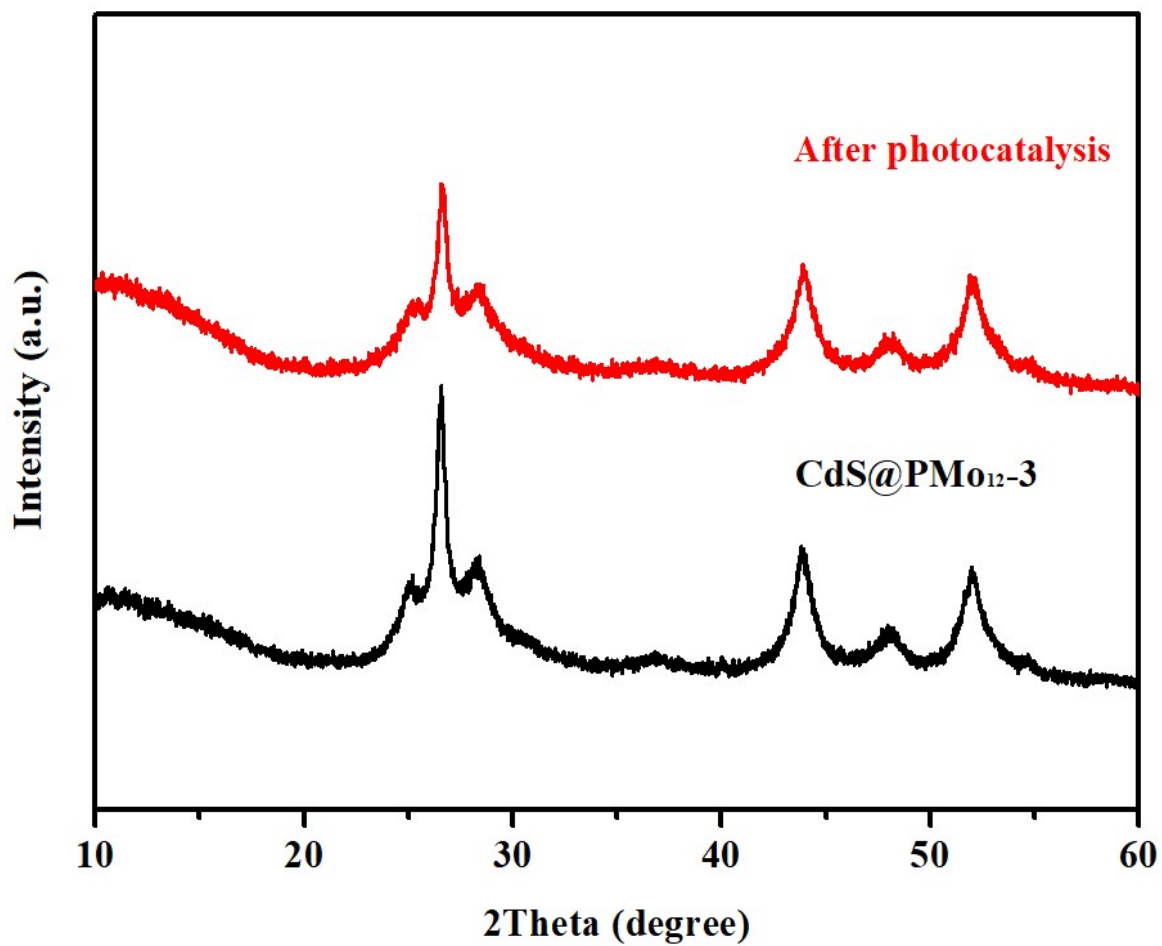

Figure S14. PXRD patterns of CdS@PMo<sub>12-3</sub> before and after the photocatalytic H<sub>2</sub> evolution.



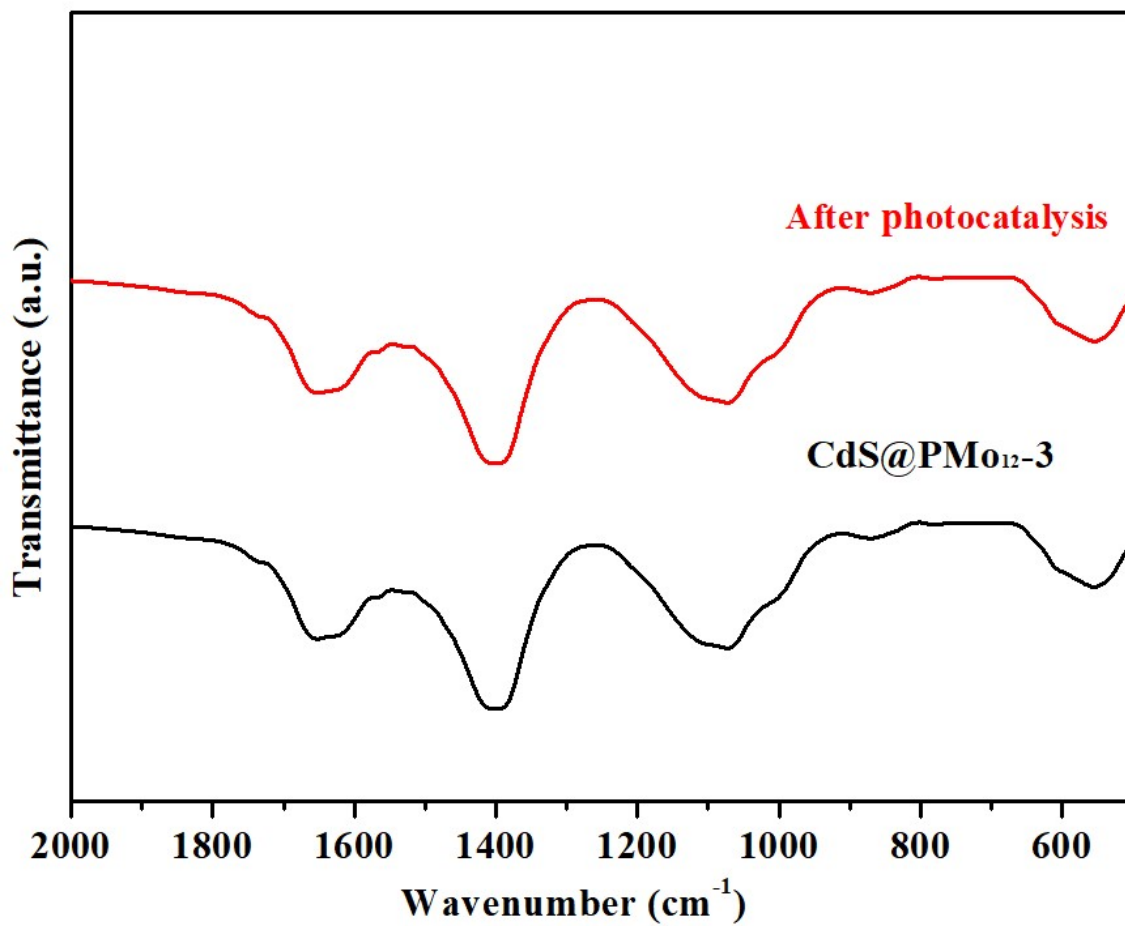

Figure S15. FT-IR spectra of CdS@PMo<sub>12</sub>-3 before and after the photocatalytic H<sub>2</sub> evolution.

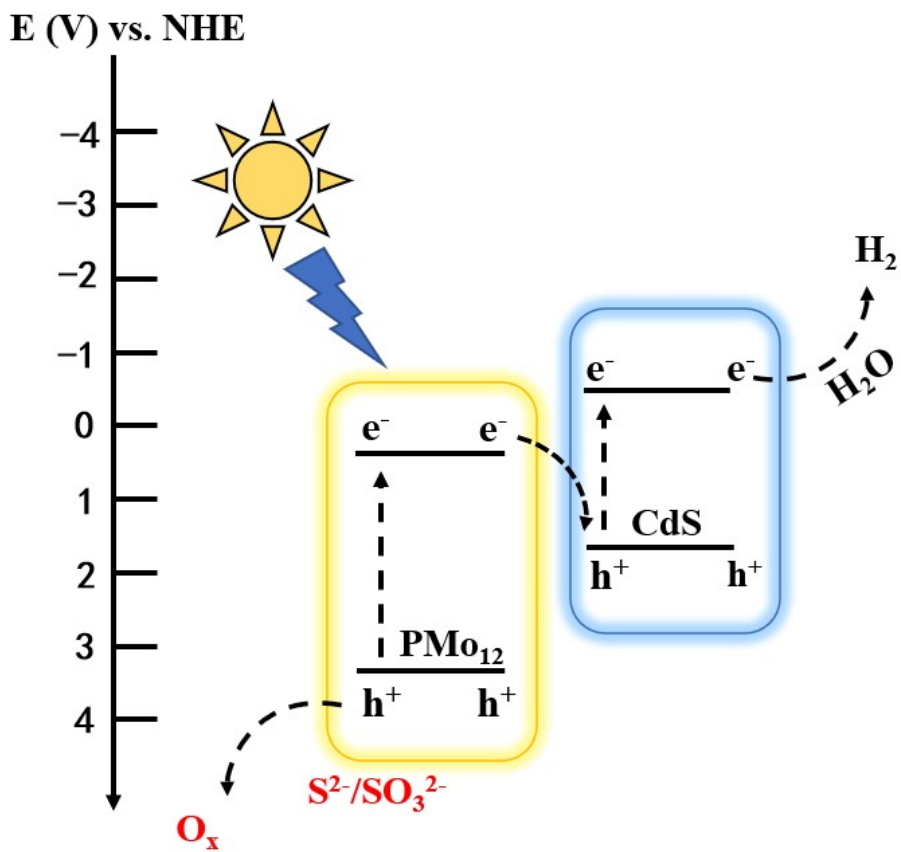

**Figure S16.** Proposed possible mechanism schematic of CdS@PMo<sub>12</sub> composite.

**Table S1.** ICP-MS results of CdS@PMo<sub>12</sub>.

| Compounds                | PMo <sub>12</sub> (mg) | Elements<br>Mo (wt%) |
|--------------------------|------------------------|----------------------|
| CdS@PMo <sub>12</sub> -1 | 10                     | 0.7                  |
| CdS@PMo <sub>12</sub> -2 | 30                     | 1.1                  |
| CdS@PMo <sub>12</sub> -3 | 50                     | 1.8                  |
| CdS@PMo <sub>12</sub> -4 | 70                     | 2.7                  |

**Table S2.** A comparison of the H<sub>2</sub>-production rates of the POM-based photocatalysts and most CdS-based photocatalysts.

| Photocatalyst                                          | Amounts of catalyst(mg) | Activity (mmol h <sup>-1</sup> g <sup>-1</sup> ) | Refs      |
|--------------------------------------------------------|-------------------------|--------------------------------------------------|-----------|
| CdS@PMo <sub>12</sub> -3                               | 2                       | 5.7                                              | This Work |
| CdS-P <sub>5</sub> W <sub>30</sub>                     | 50                      | 1.9                                              | 1         |
| Ti <sub>3</sub> C <sub>2</sub> T <sub>x</sub> /CdS     | 20                      | 0.8                                              | 2         |
| CdS-NiE-350                                            | 100                     | 4.3                                              | 3         |
| NiS/CdS                                                | 30                      | 2.2                                              | 4         |
| M-G/CdS                                                | 100                     | 2.3                                              | 5         |
| Au-Pt-CdS                                              | 50                      | 0.8                                              | 6         |
| CdS-NRs/NMOF-Ni                                        | 50                      | 4.5                                              | 7         |
| Ag <sub>2</sub> S/CdS                                  | 50                      | 0.7                                              | 8         |
| MnO <sub>2</sub> @CdS                                  | 5                       | 3.9                                              | 9         |
| P <sub>2</sub> W <sub>15</sub> V <sub>3</sub> @MIL-101 | 3                       | 0.9                                              | 10        |
| Co-POM                                                 | 1                       | 2.0                                              | 11        |

## References

1. H. Chen, Y. Cao, R. Wang, Y. Li, M. Liu, L. Zhang and W. You, Enhanced photocatalytic performance in preyssler-type  $P_5W_{30}$ -CdS nanohybrids synthesized by l-cystine-mediated hydrothermal assembly, *Int. J. Hydrogen Energy*, 2019, **44**, 13052-13060.
2. Y. Yang, D. Zhang and Q. Xiang, Plasma-modified  $Ti_3C_2Tx$ /CdS hybrids with oxygen-containing groups for high-efficiency photocatalytic hydrogen production. *Nanoscale*, 2019, **11**, 18797-18805.
3. G. Zhao, Y. Sun, W. Zhou, X. Wang, K. Chang, G. Liu, H. Liu, T. Kako and J. Ye, Superior Photocatalytic  $H_2$  Production with Cocatalytic Co/Ni Species Anchored on Sulfide Semiconductor, *Adv. Mater.*, 2017, **29**, 1703258.
4. W. Zhang, Y. Wang, Z. Wang, Z. Zhong and R. Xu, Highly efficient and noble metal-free NiS/CdS photocatalysts for  $H_2$  evolution from lactic acid sacrificial solution under visible light, *Chem. Commun.*, 2010, **46**, 7631-7633.
5. M. Liu, F. Li, Z. Sun, L. Ma, L. Xu and Y. Wang, Noble-metal-free photocatalysts  $MoS_2$ -graphene/CdS mixed nanoparticles/nanorods morphology with high visible light efficiency for  $H_2$  evolution, *Chem. Commun.*, 2014, **50**, 11004-11007.
6. L. Ma, K. Chen, F. Nan, J. H. Wang, D. J. Yang, L. Zhou and Q. Q. Wang, Improved Hydrogen Production of Au-Pt-CdS Hetero-Nanostructures by Efficient Plasmon-Induced Multipathway Electron Transfer, *Adv. Funct. Mater.*, 2016, **26**, 6076-6083.
7. H. Yang, C. Yang, N. Zhang, K. Mo, Q. Li, K. Lv, J. Fan and L. Wen, Drastic promotion of the photoreactivity of MOF ultrathin nanosheets towards hydrogen production by deposition with CdS nanorods, *Appl. Catal., B*, 2021, **285**, 119801.
8. C. Lu, S. Du, Y. Zhao, Q. Wang, K. Ren, C. Li and W. Dou, Efficient visible-light photocatalytic  $H_2$  evolution with heterostructured  $Ag_2S$  modified CdS nanowires, *RSC Adv.*, 2021, **11**, 28211-28222.
9. S. Zulfiqar, S. Liu, N. Rahman, H. Tang, S. Shah, X. H. Yu and Q. Q. Liu, Construction of S-scheme  $MnO_2@CdS$  heterojunction with core-shell structure as  $H_2$ -production photocatalyst, *Rare Met.*, 2021, **40**, 2381-2391.
10. W. Sun, B. An, B. Qi, T. Liu, M. Jin and C. Duan, Dual-Excitation Polyoxometalate-Based Frameworks for One-Pot Light-Driven Hydrogen Evolution and Oxidative Dehydrogenation, *ACS Appl. Mater. Interfaces.*, 2018, **10**, 13462-13469.
11. H. Li, S. Yao, H. L. Wu, J. Y. Qu, Z. M. Zhang, T. B. Lu, W. Lin and E. B. Wang, Charge-regulated sequential adsorption of anionic catalysts and cationic photosensitizers into metal-organic frameworks enhances photocatalytic proton reduction, *Appl. Catal., B*, 2018, **224**, 46-52.
